# Supplementary material for: The template role of caffeine in its one-step encapsulation in MOF NH2-MIL-88B(Fe)
Source: Royal Society of Chemistry journal article supplement (doi:10.1039/c3tb21707h), 2013-12-13
Supplement: c3tb21707h.pdf [file c3tb21707h.pdf]

## Supporting information

### Template role of caffeine in its one-step encapsulation in MOF NH<sub>2</sub>-MIL-88B(Fe)

Nuria Liédana, Pablo Lozano, Alejandro Galve, Carlos Téllez, Joaquín Coronas\*

Chemical and Environmental Engineering Department and Instituto de Nanociencia de Aragón (INA), Universidad de Zaragoza, 50018 Zaragoza, Spain.

\*Corresponding author: coronas@unizar.es

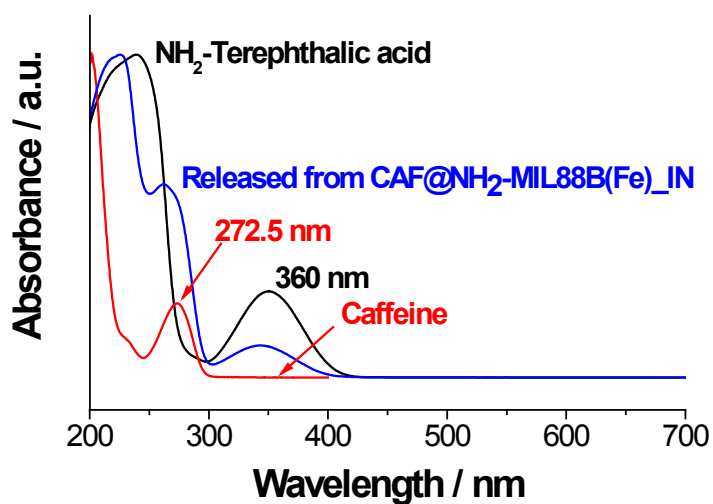

Figure S1. UV-VIS in water for caffeine, 2-aminoterephthalic acid and the liquid extract from CAF@NH<sub>2</sub>-MIL-88B(Fe) at the end of the drug release experiment at 80 °C.

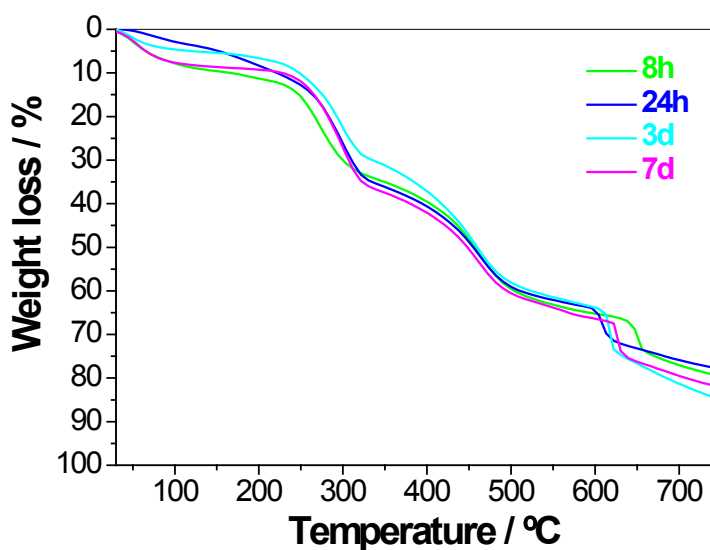

Figure S2. TGA curves of CAF@NH<sub>2</sub>-MIL-88B(Fe)\_EX after caffeine encapsulation during 8 h, 24 h, 3 days and 7 days.

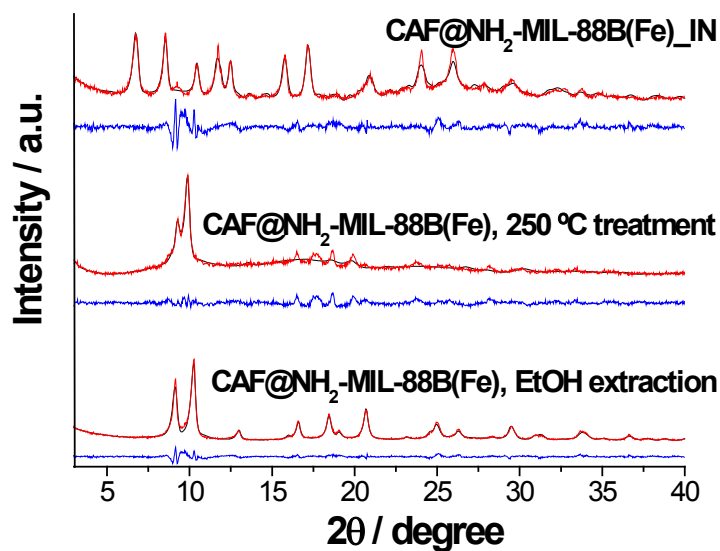

Figure S3. Experimental (red line) and simulated (black line) X-ray diffraction patterns after structure resolution of CAF@NH<sub>2</sub>-MIL-88B(Fe)\_IN, NH<sub>2</sub>-MIL-88B(Fe) obtained by ethanol extraction of CAF@NH<sub>2</sub>-MIL-88B(Fe)\_IN and NH<sub>2</sub>-MIL-88B obtained by treatment at 250 °C of CAF@NH<sub>2</sub>-MIL-88B(Fe)\_IN.

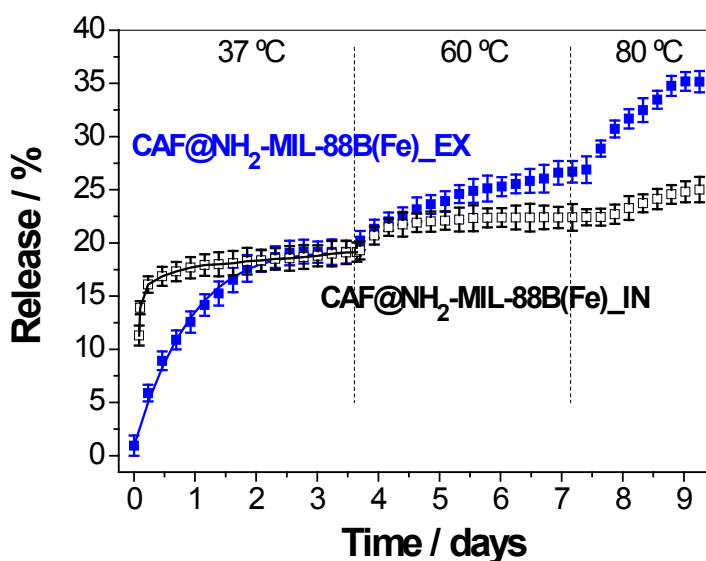

Figure S4. Caffeine release experiments in water at 37, 60 and 80 °C determined by UV-VIS absorption from CAF@NH<sub>2</sub>-MIL-88B(Fe)\_IN and CAF@NH<sub>2</sub>-MIL-88B(Fe)\_EX. The release was related to the sum of the total amount of dry solid, excluding remaining solvent, i.e. TGA weight loss below 150 °C, and including encapsulated caffeine.

The continuous lines in Figures S4, 6 and 7 were obtained applying the following equation:

$$X_A = \left\{ 1 - [k_1(n-1)t + k_2]^{\frac{1}{1-n}} \right\} X_{A0}$$

where  $X_A$  and  $X_{A0}$  are the amount released in a given time and the total amount released (both in g caffeine per (g caffeine + g dry solid)),  $t$  the time (days), and  $k_1$  ( $\text{days}^{-1}$ ),  $k_2$  and  $n$  constants. The regression factors ( $R^2$ ) were above 0.9, while the  $k_1$ ,  $k_2$  and  $n$  values are shown in Table S1.

Table S1. Parameter values according to equation (1); (w) and (PBS) refer to release experiments carried out at 37 °C in water and PBS media.

| <b>CAF@NH<sub>2</sub>-MIL-88B(Fe)_IN</b> | <b>k<sub>1</sub> (d<sup>-1</sup>)</b> | <b>k<sub>2</sub></b> | <b>n</b>  | <b>R<sup>2</sup></b> |
|------------------------------------------|---------------------------------------|----------------------|-----------|----------------------|
| <b>Caffeine</b>                          | 0.9 (w)                               | 1.1 (w)              | 3.6 (w)   | 0.991 (w)            |
|                                          | 2.0 (PBS)                             | 1.0 (PBS)            | 0.9 (PBS) | 0.992 (PBS)          |
| <b>2-NH<sub>2</sub>-BDC</b>              | 0.3 (w)                               | 1.1 (w)              | 3.7 (w)   | 0.990 (w)            |
|                                          | 1.7 (PBS)                             | 1.0 (PBS)            | 1.2 (PBS) | 0.993 (PBS)          |
| <b>CAF@NH<sub>2</sub>-MIL-88B(Fe)_EX</b> | <b>k<sub>1</sub> (d<sup>-1</sup>)</b> | <b>k<sub>2</sub></b> | <b>n</b>  | <b>R<sup>2</sup></b> |
| <b>Caffeine</b>                          | 5633 (w)                              | 18173 (w)            | 9.6 (w)   | 0.974 (w)            |
| <b>NH<sub>2</sub>-MIL-88B(Fe)</b>        | <b>k<sub>1</sub> (d<sup>-1</sup>)</b> | <b>k<sub>2</sub></b> | <b>n</b>  | <b>R<sup>2</sup></b> |
| <b>2- NH<sub>2</sub>-BDC</b>             | 297 (PBS)                             | 1.7 (PBS)            | 2.5 (PBS) | 0.991 (PBS)          |
